# Supplementary material for: Investigating the stable operating voltage for the MnFe2O4 Li-ion battery anode
Source: Royal Society of Chemistry journal article supplement (doi:10.1039/d1se00044f), 2021-01-01
Supplement: d1se00044f1.pdf [file d1se00044f1.pdf]

## Supplementary information

### **Investigating the Stable Operating Voltage for MnFe<sub>2</sub>O<sub>4</sub> Li-ion Battery**

#### **Anode**

Sourav Ghosh <sup>a, d, \*</sup>, Timothy de Donder <sup>b</sup>, Klas Gunnarsson <sup>c</sup>, V. Kiran Kumar <sup>d</sup>, Surendra K. Martha <sup>d</sup>, Peter Svedlindh <sup>c</sup>, Vadim G. Kessler, <sup>b</sup> Gulaim A. Seisenbaeva <sup>b \*</sup>, Vilas G. Pol <sup>a \*</sup>

<sup>a</sup> *Davidson School of Chemical Engineering, Purdue University, West Lafayette, IN, 47907, USA*

<sup>b</sup> *Department of Molecular Sciences, Swedish University of Agricultural Sciences, BioCenter, Almas allé 5, Box 7015, SE-75007 Uppsala, Sweden*

<sup>c</sup> *Department of Materials Science and Engineering, Uppsala University, Box 35, SE-75103 Uppsala, Sweden*

<sup>d</sup> *Department of Chemistry, Indian Institute of Technology, Hyderabad, Kandi, Telangana-502285, India.*

\*Corresponding Author: [vpol@purdue.edu](mailto:vpol@purdue.edu); [Gulaim.Seisenbaeva@slu.se](mailto:Gulaim.Seisenbaeva@slu.se); [cy15resch11006@iith.ac.in](mailto:cy15resch11006@iith.ac.in)

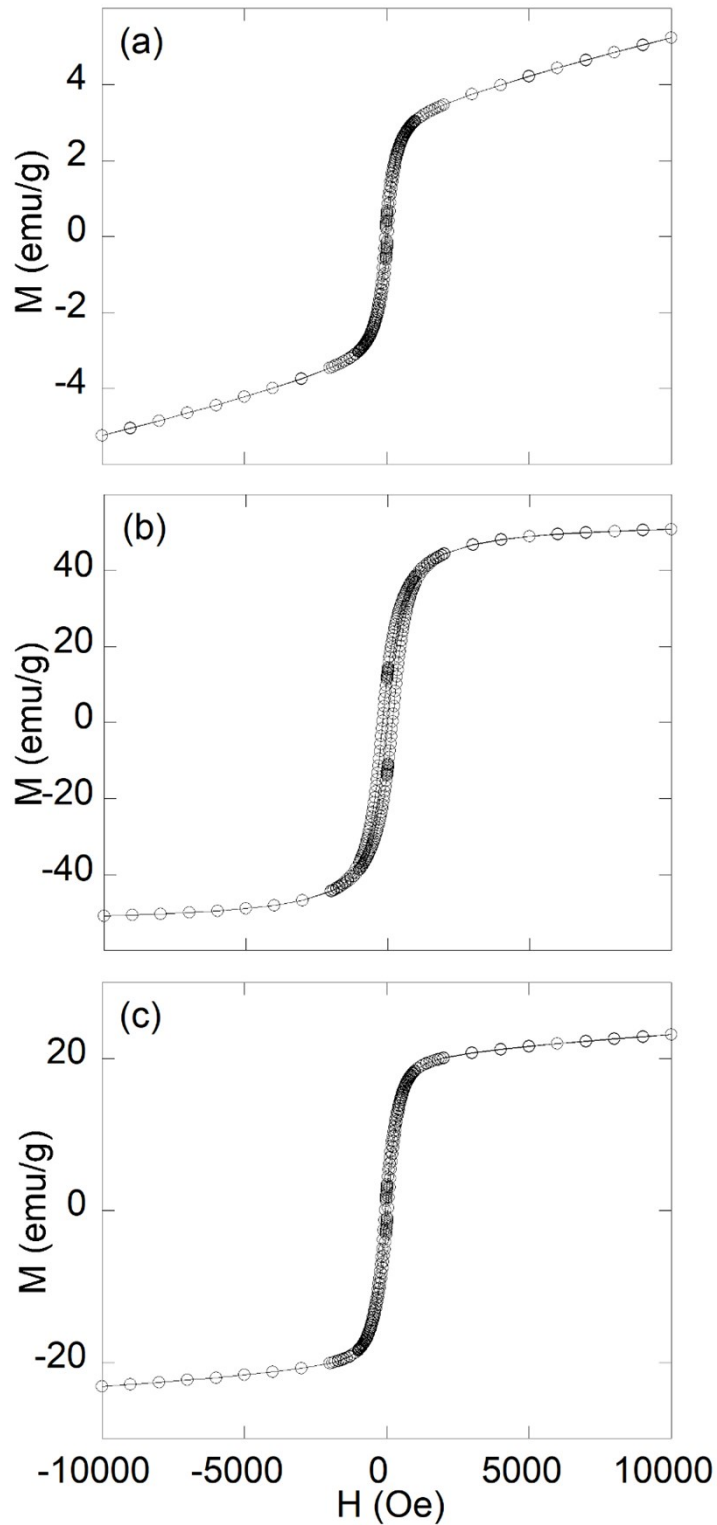

**Figure S1.** Magnetization versus applied magnetic field recorded at room temperature for (A)  $\text{MnFe}_2\text{O}_4$  obtained at  $70^\circ\text{C}$  in 1 h; (B)  $\text{MnFe}_2\text{O}_4$  obtained at  $100^\circ\text{C}$  in 1 h; (C)  $\text{Mn}_{1.5}\text{Fe}_{1.5}\text{O}_4$  obtained at  $100^\circ\text{C}$  in 1h.

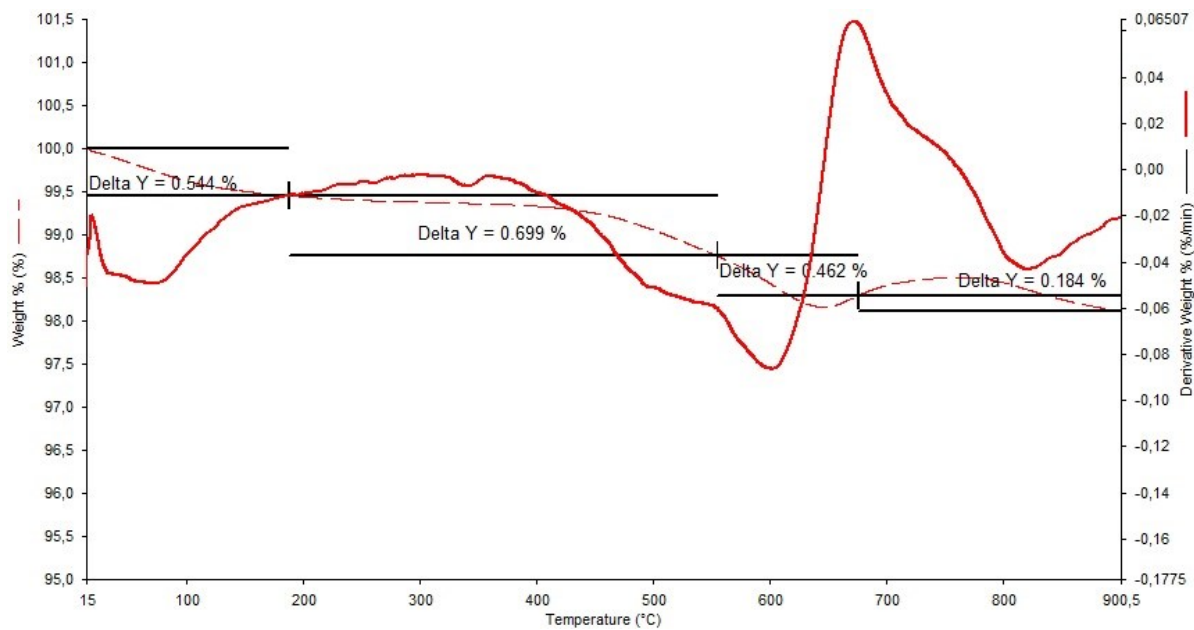

**Figure S2.** TGA of MnFe<sub>2</sub>O<sub>4</sub> in air.

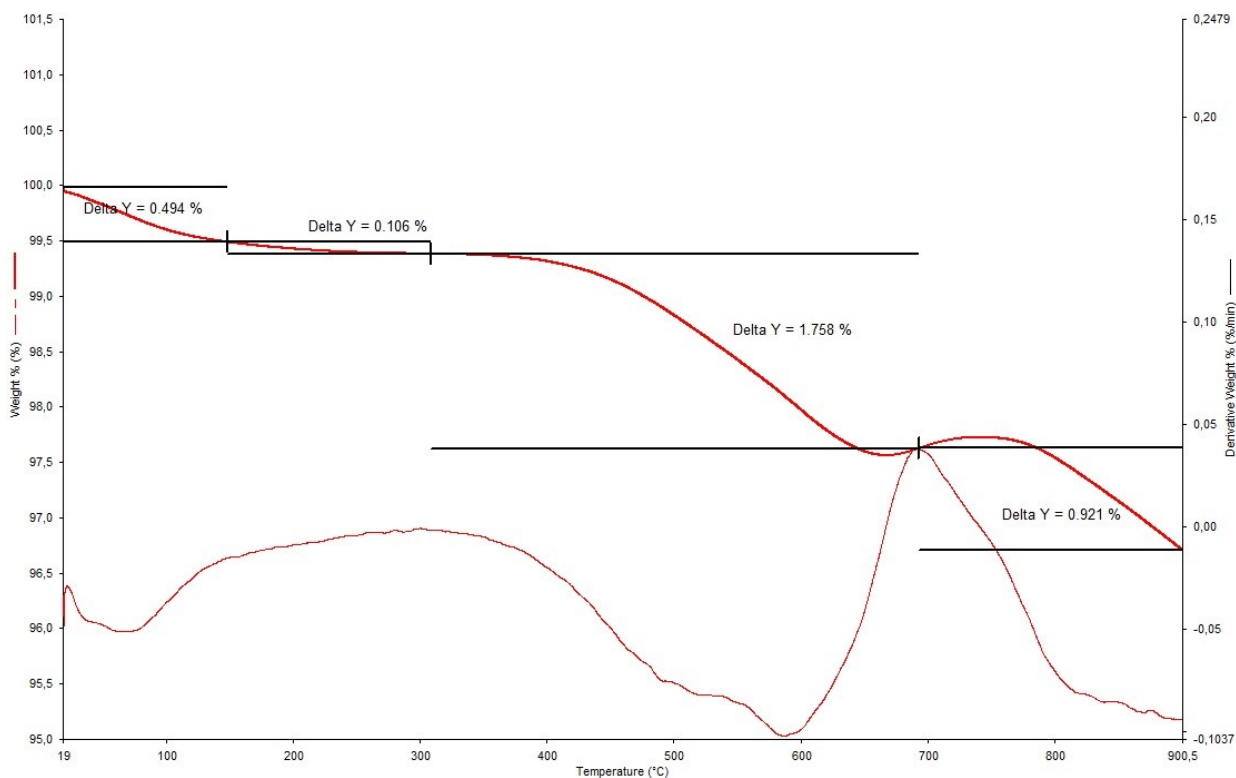

**Figure S3.** TGA of MnFe<sub>2</sub>O<sub>4</sub> in nitrogen atmosphere.

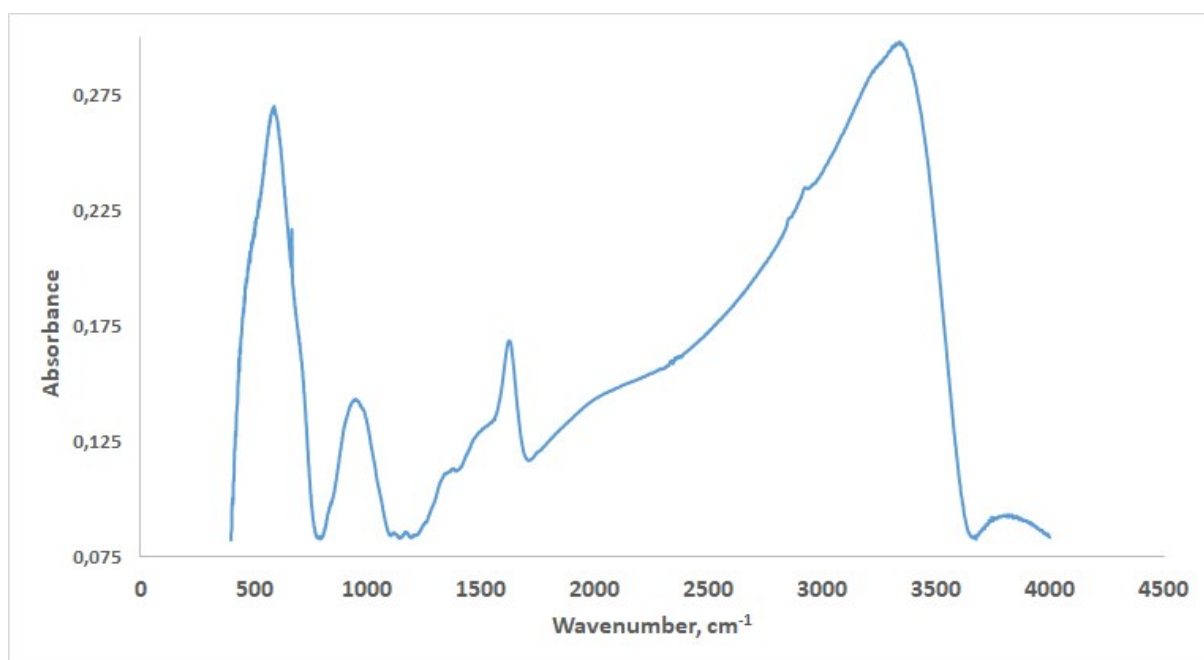

**Figure S4.** FTIR spectrum of MnFe<sub>2</sub>O<sub>4</sub> powder.
